## CORRESPONDENCE

# Increasing incidence of chronic subdural haematoma in the elderly

V. Adhiyaman and I. Chatterjee

From the Glan Clwyd Hospital

Address correspondence to V. Adhiyaman, Care of the Elderly Department, Glan Clwyd Hospital, Rhyl, Wales LL18 5UJ, UK email: adhiyamanv@yahoo.co.uk

Dear Editor

We thank Dr Jolobe for his comments following our article on increasing incidence of chronic subdural haematoma in the elderly.<sup>1</sup> There is indeed no role for dual antiplatelets (aspirin and clopidogrel) for thromboprophylaxis in atrial fibrillation. Even though one study showed reduced rate of ischaemic stroke with clopidogrel plus aspirin, as compared with aspirin alone among patients with atrial fibrillation in patients considered unsuitable for a vitamin K antagonist, there was a significant increase in the risk of major haemorrhage.<sup>2</sup> Since dual antiplatelet therapy is not recommended in any guidelines for stroke prevention in

atrial fibrillation and is not part of clinical practice, we didn't think it needed mentioning.

## References

1. Adhiyaman V, Chattopadhyay I, Irshad F, Curran D, Abraham S. Increasing incidence of chronic subdural haematoma in the elderly. *QJ Med* 2017; **110**:375–78.
2. Connolly SJ, Pogue J, Hart RG, Hohnloser SH, Pfeffer M, Chrolavicius S, for the ACTIVE Investigators, et al. Effect of clopidogrel added to aspirin in patients with atrial fibrillation. *N Engl J Med* 2009; **360**:2066–78.
